# Supplementary material for: Assessment of Mosaicism and Detection of Cryptic Alleles in CRISPR/Cas9-Engineered Neurofibromatosis Type 1 and TP53 Mutant Porcine Models Reveals Overlooked Challenges in Precision Modeling of Human Diseases
Source: PubMed Central journal article supplement (PMC8495252; doi:10.3389/fgene.2021.721045), 2021-09-23

## Supplementary Figure 2

Complete gel electrophoresis image of *NF1* a31 excision in Figure 5C.

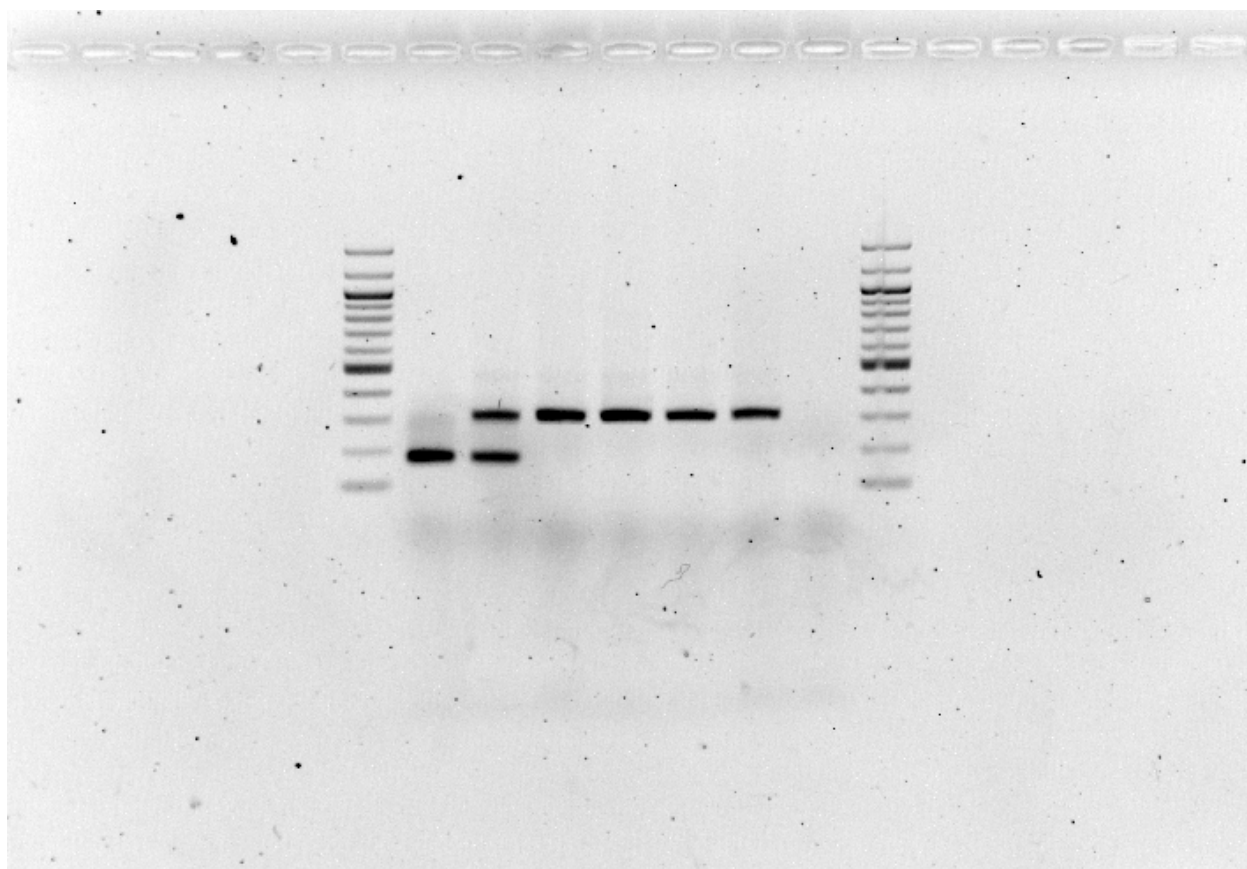

Supplement: Image_2.pdf [file Image_2.pdf]
